# Supplementary material for: Women in the Hunt: A More Useful and Sustainable Hunt for Biodiversity?
Source: MDPI journal article supplement (doi:10.3390/su15097439), 2023-04-30
Supplement: s1 [file s1]

## Supplementary Material

## Women in the hunt: a more useful and sustainable hunt for biodiversity?

Javier Pérez-González, Sebastian J. Hidalgo de Trucios, Carlos Sánchez-García and Juan Ignacio Rengifo Gallego

**Table S1.** Correlation matrix (Spearman method) for the variables related to the interest in hunting big game species. All paired correlations were significant.

[illegible]

**Table S2.** Correlation matrix (Spearman method) for the variables related to the interest in hunting small game species. All paired correlations were significant.

|           | Hare  | Partridge | Pigeons | Thrushes | Dove  | Quai  | Starling | Waterfowl | Lapwing | Woodcock | Magpie | Pheasant | Fox   |
|-----------|-------|-----------|---------|----------|-------|-------|----------|-----------|---------|----------|--------|----------|-------|
| Rabbit    | 0.544 | 0.539     | 0.400   | 0.361    | 0.382 | 0.354 | 0.256    | 0.180     | 0.202   | 0.167    | 0.286  | 0.270    | 0.350 |
| Hare      |       | 0.421     | 0.305   | 0.245    | 0.339 | 0.375 | 0.331    | 0.272     | 0.301   | 0.264    | 0.278  | 0.326    | 0.337 |
| Partridge |       |           | 0.452   | 0.388    | 0.430 | 0.503 | 0.249    | 0.244     | 0.205   | 0.325    | 0.255  | 0.326    | 0.353 |
| Pigeons   |       |           |         | 0.557    | 0.646 | 0.334 | 0.379    | 0.346     | 0.304   | 0.236    | 0.362  | 0.305    | 0.400 |
| Thrushes  |       |           |         |          | 0.597 | 0.357 | 0.445    | 0.326     | 0.330   | 0.240    | 0.321  | 0.314    | 0.328 |
| Dove      |       |           |         |          |       | 0.452 | 0.474    | 0.416     | 0.394   | 0.306    | 0.384  | 0.359    | 0.445 |
| Quai      |       |           |         |          |       |       | 0.389    | 0.365     | 0.347   | 0.483    | 0.333  | 0.435    | 0.317 |
| Starling  |       |           |         |          |       |       |          | 0.596     | 0.769   | 0.476    | 0.634  | 0.602    | 0.467 |
| Waterfowl |       |           |         |          |       |       |          |           | 0.700   | 0.531    | 0.528  | 0.559    | 0.397 |
| Lapwing   |       |           |         |          |       |       |          |           |         | 0.534    | 0.624  | 0.604    | 0.421 |
| Woodcock  |       |           |         |          |       |       |          |           |         |          | 0.434  | 0.539    | 0.335 |
| Magpie    |       |           |         |          |       |       |          |           |         |          |        | 0.550    | 0.572 |
| Pheasant  |       |           |         |          |       |       |          |           |         |          |        |          | 0.439 |

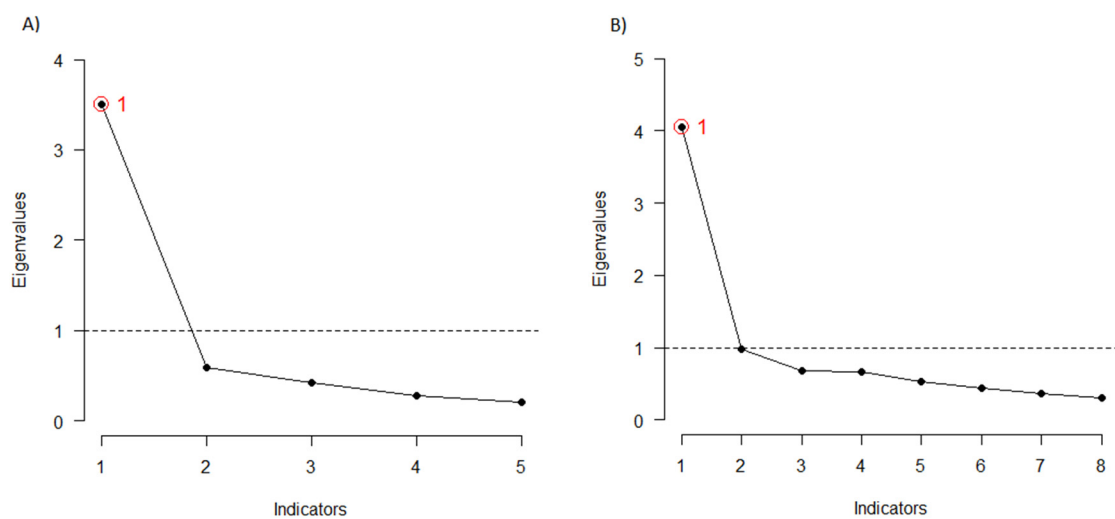

**Figure S1.** Number of PCs suggested by Kaiser-Guttman criterion. A) PCA with the big game species for which women had the highest interest. B) PCA with the small game species for which women had the highest interest.

**Table S3.** Lineal models for the interest of women and men in hunting game species (PCA with all big game and small game species). A) Lineal model results with the extracted PC1 scores for all the big game species as the response variable and sex as the explanatory factor. B) Lineal model results with the extracted PC1 scores for all the small game species as response variable and sex as the explanatory factor. C) Lineal model results with the extracted PC1 scores for all the big game and small game species as response variable and sex, hunting type (big game vs. small game species) and the interaction of both as the explanatory factors.

|                    | Factor             | Estimate | SE     | t value | p       |
|--------------------|--------------------|----------|--------|---------|---------|
| A)                 | Intercept          | 0,688    | 0,136  | 5,063   | < 0.001 |
| Big game hunting   | Sex                | -0,858   | 0,152  | -5,651  | < 0.001 |
| B)                 | Intercept          | -0,215   | 0,138  | -1,553  | 0,121   |
| Small game hunting | Sex                | 0,268    | 0,154  | 1,733   | 0,083   |
| C)                 | Intercept          | 0,6883   | 0,1371 | 5,019   | < 0.001 |
| All                | Sex                | -0,8576  | 0,1531 | -5,602  | < 0.001 |
|                    | Hunting type       | -0,9031  | 0,1939 | -4,657  | < 0.001 |
|                    | Sex * Hunting type | 1,1252   | 0,2165 | 5,198   | < 0.001 |

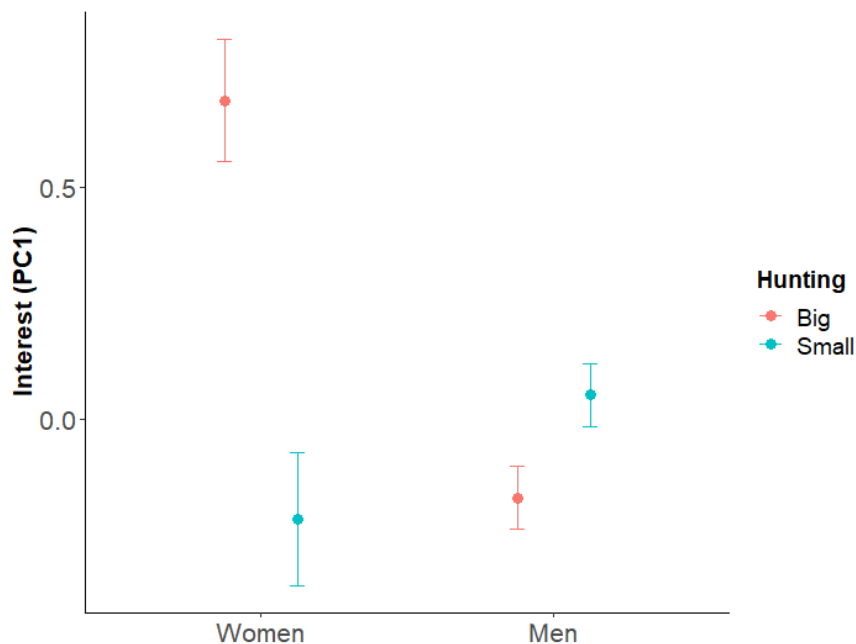

**Figure S2.** Interest of women and men in hunting big game and small game species (PCA with all big game and small game species). The plot shows mean and standard errors. As interest values, we used the PC1 scores for all the big game and small game species.
